# Supplementary material for: T 1-Weighted MR/CT dual-modality imaging-guided photothermal therapy using gadolinium-functionalized triangular gold nanoprism
Source: Royal Society of Chemistry journal article supplement (doi:10.1039/c7ra01101f), 2017-01-01
Supplement: c7ra01101f1.pdf [file c7ra01101f1.pdf]

## Supporting Information

# **T<sub>1</sub>-weighted-MR/CT dual-modality imaging guided photothermal therapy using gadolinium functionalized triangular gold nanoprism**

Wenfei Liu<sup>a</sup>, Kai Liu<sup>c</sup>, Ying Zhao<sup>a</sup>, Shuang Zhao<sup>a</sup>, Song Luo<sup>a</sup>, Ying Tian<sup>a</sup>, Zhaogang, Teng<sup>\*,a,b</sup>, Shouju Wang<sup>\*,a</sup>, Guangming Lu<sup>\*,a,b</sup>

<sup>a</sup> Department of Medical Imaging, Jinling Hospital, Medical School of Nanjing University, Nanjing, 210002, P.R. China

<sup>b</sup> Department of Medical Imaging, Jinling Hospital, Medical School of Nanjing University, Nanjing, 210002, P.R. China

<sup>c</sup> Nanjing Stomatological Hospital, Medical School of Nanjing University, Nanjing, 210008, P.R. China

\*Corresponding author email: Zhaogang Teng, email: [tzg@fudan.edu.cn](mailto:tzg@fudan.edu.cn), or Shouju Wang, email: [Shouju.wang@gmail.com](mailto:Shouju.wang@gmail.com), or Guangming Lu, email: [cjr.luguangming@vip.163.com](mailto:cjr.luguangming@vip.163.com)

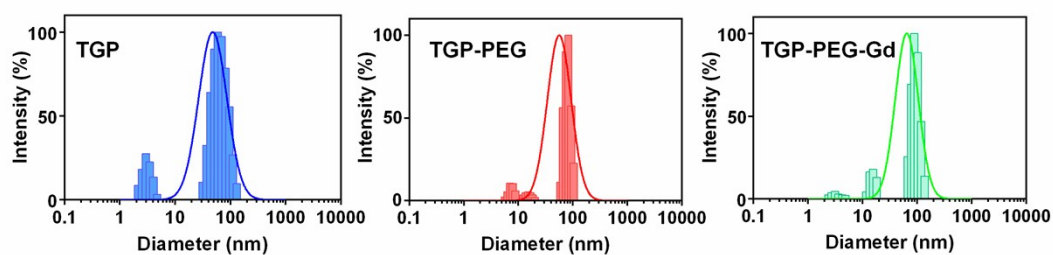

**Figure S1.** The raw intensity of DLS distribution of (a) TGP, (b) TGP-PEG, and (c) TGP-PEG-Gd.

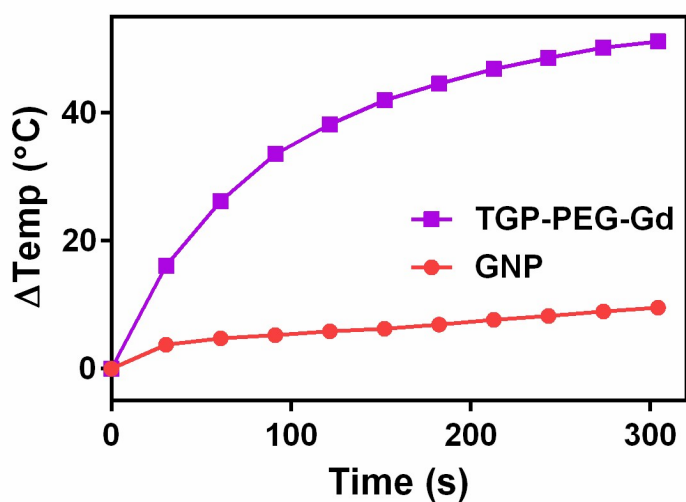

**Figure S2.** Heating curves of TGP and GNP in a similar size at the same optical density irradiated by a 660 nm laser ( $1.0 \text{ W cm}^{-2}$ , 5 min).

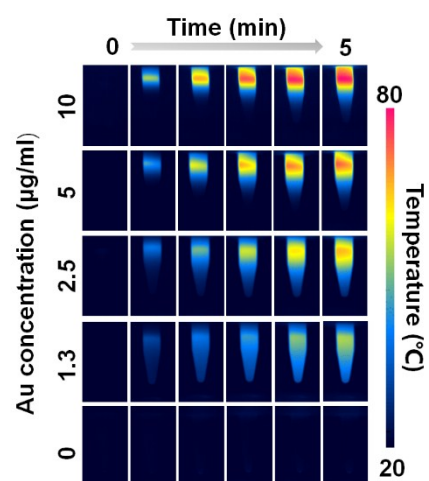

**Figure S3.** Infrared thermal images of TGP-PEG-Gd solutions at different concentrations irradiated by a 660 nm laser at  $1.0 \text{ W cm}^{-2}$  for 5 min.
